# Supplementary material
Source: HighWire-hosted journal article supplement (https://erj.ersjournals.com/content/60/6/2200795)
Supplement: inline-supplementary-material-1 [file inline-supplementary-material-1.pdf]

## The SUMMIT Consortium

Sam M Janes<sup>1</sup>, Jennifer L Dickson<sup>1</sup>, Carolyn Horst<sup>1</sup>, Sophie Tisi<sup>1</sup>, Helen Hall<sup>1</sup>, Priyam Verghese<sup>1</sup>, Andrew Creamer<sup>1</sup>, Thomas Callender<sup>1</sup>, Ruth Prendecki<sup>1</sup>, Aryn Bhamani<sup>1</sup>, Mamta Ruparel<sup>1</sup>, Allan Hackshaw<sup>2</sup>, Laura Farrelly<sup>2</sup>, Jon Teague<sup>2</sup>, Anne-Marie Mullin<sup>2</sup>, Kitty Chan<sup>2</sup>, Rachael Sarpong<sup>2</sup>, Malavika Suresh<sup>2</sup>, Samantha L Quaife<sup>3</sup>, Arjun Nair<sup>4</sup>, Anand Devaraj<sup>5</sup>,<sup>6</sup>, Kylie Gyertson<sup>4</sup>, Vicky Bowyer<sup>4</sup>, Ethaar El-Emir<sup>4</sup>, Judy Airebamen<sup>4</sup>, Alice Cotton<sup>4</sup>, Kaylene Phua<sup>4</sup>, Elodie Murali<sup>4</sup>, Simranjit Mehta<sup>4</sup>, Janine Zylstra<sup>4</sup>, Karen Parry-Billings<sup>4</sup>, Columbus Ife<sup>4</sup>, April Neville<sup>4</sup>, Paul Robinson<sup>4</sup>, Laura Green<sup>4</sup>, Zahra Hanif<sup>4</sup>, Helen Kiconco<sup>4</sup>, Ricardo McEwen<sup>4</sup>, Dominique Arancon<sup>4</sup>, Nicholas Beech<sup>4</sup>, Derya Ovayolu<sup>4</sup>, Christine Hosein<sup>4</sup>, Sylvia Patricia Enes<sup>4</sup>, Qin April Neville<sup>4</sup>, Jane Rowlands<sup>4</sup>, Aashna Samson<sup>4</sup>, Urja Patel<sup>4</sup>, Fahmida Hoque<sup>4</sup>, Hina Pervez<sup>4</sup>, Sofia Nnorom<sup>4</sup>, Moksud Miah<sup>4</sup>, Julian McKee<sup>4</sup>, Mark Clark<sup>4</sup>, Jeannie Eng<sup>4</sup>, Fanta Bojang<sup>4</sup>, Claire Levermore<sup>4</sup>, Anant Patel<sup>7</sup>, Sara Lock<sup>8</sup>, Rajesh Banka<sup>9</sup>, Angshu Bhowmik<sup>10</sup>, Ugo Ekeowa<sup>11</sup>, Zaheer Mangera<sup>12</sup>, William M Ricketts<sup>13</sup>, Neal Navani<sup>4</sup>, Terry O'Shaughnessy<sup>13</sup>, Charlotte Cash<sup>7</sup>, Magali Taylor<sup>4</sup>, Samanjit Hare<sup>7</sup>, Tunku Aziz<sup>13</sup>, Stephen Ellis<sup>13</sup>, Anthony Edey<sup>14</sup>, Graham Robinson<sup>15</sup>, Alberto Villanueva<sup>16</sup>, Hasti Robbie<sup>17</sup>, Elena Stefan<sup>18</sup>, Charlie Sayer<sup>19</sup>, Nick Screaton<sup>20</sup>, Navinah Nundlall<sup>4</sup>, Lyndsey Gallagher<sup>4</sup>, Andrew Crossingham<sup>4</sup>, Thea Buchan<sup>4</sup>, Tanita Limani<sup>4</sup>, Kate Gowers<sup>1</sup>, Kate Davies<sup>1</sup>, John McCabe<sup>1</sup>, Joseph Jacob<sup>1,24</sup>, Karen Sennett<sup>21</sup>, Tania Anastasiadis<sup>22</sup>, Andrew Perugia<sup>23</sup>, James Rusius<sup>23</sup>.

- 1 Lungs For Living Research Centre, UCL Respiratory, University College London, London
- 2 CRUK & UCL Cancer Trials Centre, University College London, London
- 3 Centre for Prevention, Detection and Diagnosis, Wolfson Institute of Population Health, Barts and The London School of Medicine and Dentistry, Queen Mary University of London, London
- 4 University College London Hospitals NHS Foundation Trust, London
- 5 Royal Brompton and Harefield NHS Foundation Trust, London
- 6 National Heart and Lung Institute, Imperial College, London
- 7 Royal Free London NHS Foundation Trust, London
- 8 Whittington Health NHS Trust, London
- 9 Barking, Havering and Redbridge University Hospitals NHS Trust, Essex
- 10 Homerton University Hospital Foundation Trust, London
- 11 The Princess Alexandra Hospital NHS Trust, Essex
- 12 North Middlesex University Hospital NHS Trust, London
- 13 Barts Health NHS Trust, London
- 14 North Bristol NHS Trust, Bristol
- 15 Royal United Hospitals Bath NHS Foundation Trust, Bath
- 16 Surrey and Sussex Healthcare NHS Trust, Surrey
- 17 King's College Hospital NHS Foundation Trust, London
- 18 The Princess Alexandra Hospital NHS Trust, London
- 19 University Hospitals Sussex NHS Foundation Trust, Sussex
- 20 Royal Papworth Hospital NHS Foundation Trust, Cambridge
- 21 Killick Street Health Centre, London
- 22 Tower Hamlets Clinical Commissioning Group, London
- 23 Noclor Research Support, London
- 24 Centre for Medical Image Computing (CMIC), London
